# Supplementary material for: Cancer research across Africa: a comparative bibliometric analysis
Source: HighWire-hosted journal article supplement (doi:10.1136/bmjgh-2022-009849), 2022-11-01

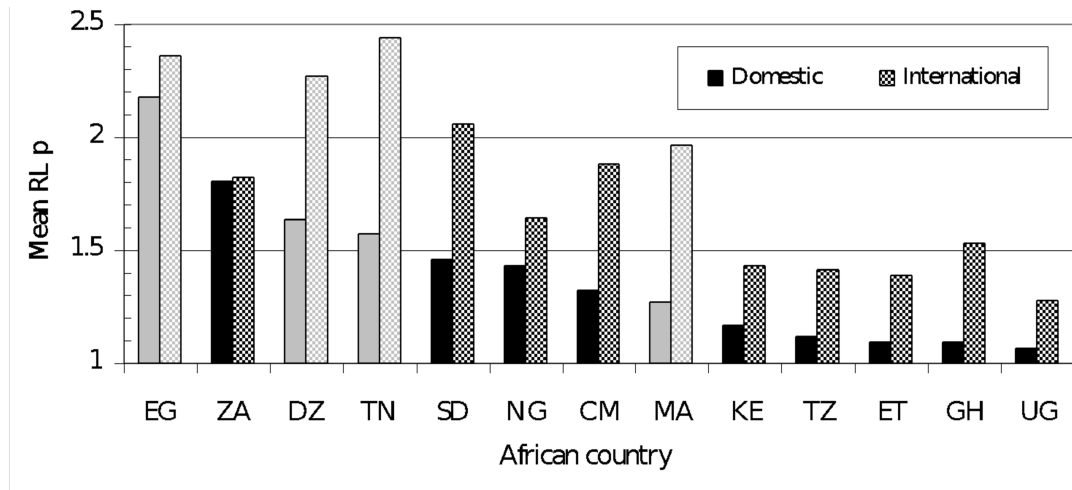

Supplement: bmjgh-2022-009849supp003_data_supplement.pdf [file bmjgh-2022-009849supp003_data_supplement.pdf]
